# Supplementary material for: Vaccinomics to Design a Multi-Epitopes Vaccine for Acinetobacter baumannii
Source: MDPI journal article supplement (doi:10.3390/ijerph19095568), 2022-05-04
Supplement: s1 [file s1]

**Table S1.** List of B cell epitopes predicted from four potential vaccine proteins.

| Protein Accession                                                       | Predicted Epitopes      |
|-------------------------------------------------------------------------|-------------------------|
| >core/298/1/Org1_Gene3311 (TonB-dependent siderophore receptor)         | FVLNGVASAQIALRLGY       |
|                                                                         | SAKTLEQQQAAQTNVA        |
|                                                                         | QDDTYAGGQVSSKSSVGFLGNKT |
|                                                                         | AMETPFNTIAYTEKYIADQQAKD |
|                                                                         | IFSTGAYGVIA             |
|                                                                         | YMSDSQFGGHLDIGRRFGEN    |
|                                                                         | YRDGEGPIKEEKT           |
|                                                                         | GVNLPKAPNPDTLLNPTWTVYNT |
|                                                                         | KTEIQNEAGDI             |
|                                                                         | RETDDEAGIRQGFPEGDRVNT   |
|                                                                         | YNPNWGSKPNRVPIAPIFSNK   |
|                                                                         | VTESLNGQGVRNINGRYDKNA   |
|                                                                         | LSSGGTVPTGQNYENEGQIFSPF |
|                                                                         | VIKSTDEKIKSIYGADGEQR    |
|                                                                         | TKTRIASELGNVVAG         |
|                                                                         | ASKQYIYNDNSTSVP         |
| >core/2148/1/Org1_Gene1404 (OmpA family protein)                        | VLGGHLKPAAPVVEVAPV      |
|                                                                         | EPTPVAPQPQELTED         |
|                                                                         | FFDTNKSNIKDQYKPE        |
|                                                                         | NTGPRKLNERL             |
|                                                                         | FAWDQPIADNKTKEGRA       |
| >core/3446/1/Org1_Gene2677 (type IV pilus biogenesis stability protein) | RTVVVQPGQEAAAP          |
|                                                                         | EGSKPNLEKAEHY           |
|                                                                         | MERYNDAIE               |
|                                                                         | QQQIPAATQMYEQYVRTVGQKN  |
|                                                                         | RALFPESPEYQR            |
|                                                                         | LYGYRWARDNVGQ           |

|                                                               |                           |
|---------------------------------------------------------------|---------------------------|
| >core/1212/7/Org7_Gene3542 (OprD family outer membrane porin) | EQSEAKGFVEDA              |
|                                                               | DKKQGAKDTSS               |
|                                                               | KIGENKNAGNQMIPKH          |
|                                                               | NDGSAYDHWAR               |
|                                                               | DQMSDQINTDADASGRGLD       |
|                                                               | KQPLANDSS                 |
|                                                               | KFDANAHTYSATGTVAPNYAADGIA |
|                                                               | GEEK                      |
|                                                               | TGNVGYDYGQNADG            |
|                                                               | DFGKLGVLPG                |
|                                                               | WDIKVRNVTTDDAQR           |
|                                                               | SDAYQGAYIGDT              |

**Table S2.** MHC –I and MHC-II predicted epitopes.

| <b>MHC-I (Epitopes)</b> | <b>Percentile Score</b> | <b>MHC-II (Epitopes)</b> | <b>Percentile Score</b> |
|-------------------------|-------------------------|--------------------------|-------------------------|
| LEQQQAAQT               | 2.6                     | KTLEQQQAAQT              | 8                       |
| QDDTYAGGQV              | 18                      | QDDTYAGGQVSSKSS          | 1.80                    |
| GSKPNRVPI               | 0.31                    | YNPNWGSKPNRVPI           | 21                      |
| GQGVRNINGR              | 3.5                     | VTESLNGQGVRNIN           | 19                      |
| SIYGADGEQR              | 0.23                    | EKIKSIYGADGEQR           | 19                      |
| LTNGPELQDD              | 15                      | GNLTNNGPELQDD            | 26                      |
| FQDSQHNNG               | 12                      | FQDSQHNNGGKDG            | 54                      |
| TPVAPQPQEL              | 0.07                    | PTPVAPQPQELTED           | 9.80                    |
| FDTNKSNIKDQYKPE         | 11                      | FDTNKSNIKDQYKPE          | 41                      |
| IADNKTKEGR              | 2.7                     | DQPIADNKTKEGRA           | 45                      |
| YVRTVGQKN               | 6.8                     | QMYEQYVRTVGQKN           | 8.40                    |

|            |      |                 |      |
|------------|------|-----------------|------|
| YGYRWARDNV | 14   | YGYRWARDNVG     | 8.40 |
| KIGENKNAG  | 18   | KIGENKNAGNQMI   | 13   |
| NTDADASGR  | 0.67 | DQINTDADASGRGLD | 36   |
| AADGIAGEEK | 1.3  | VAPNYAADGIAGEEK | 4.20 |
| NVGYDYGQNA | 1.2  | GNVGYDYGQNADG   | 28   |
| NVTDDAQR   | 0.17 | WDIKVRNVTTDDAQR | 21   |

**Table S3.** Docking score of top 20 complexes of designed vaccine construct to MHC-I complexes generated by patchDock server.

| <b>Solution No</b> | <b>Score</b> | <b>Area</b> | <b>ACE</b> | <b>Transformation</b>                 |
|--------------------|--------------|-------------|------------|---------------------------------------|
| 1                  | 22972        | 4577.9      | 385.16     | -1.38 0.44 1.65 17.60 20.70 -25.44    |
| 2                  | 21532        | 3064.3      | 215.95     | -0.73 -0.32 -0.33 -38.41 -14.52 40.15 |
| 3                  | 21376        | 4205.6      | -26.00     | 2.44 1.15 -2.23 -26.96 -28.12 19.72   |
| 4                  | 21348        | 4023.7      | -183.75    | 2.71 1.24 -2.66 -29.08 -26.38 24.55   |
| 5                  | 21084        | 3362.3      | 356.74     | -0.10 -1.09 0.35 -1.56 38.52 -37.94   |
| 6                  | 19992        | 3107.8      | 433.65     | -1.88 0.16 3.06 17.09 -9.48 -1.29     |
| 7                  | 19166        | 3697.1      | 29.85      | 3.06 -0.75 -1.90 -43.23 22.68 -84.90  |
| 8                  | 18956        | 4994.1      | 121.34     | -1.98 -0.73 0.18 -1.03 -3.71 1.30     |
| 9                  | 18850        | 2397.2      | 432.49     | -0.71 -0.26 1.53 -58.22 14.00 -64.53  |
| 10                 | 18684        | 2465.1      | 83.37      | 0.19 -1.24 2.22 -10.41 -20.61 43.09   |
| 11                 | 18326        | 3234.7      | 299.37     | -2.93 -0.72 0.87 -33.55 39.11 -18.27  |
| 12                 | 18274        | 2713.2      | 177.82     | 0.56 0.44 -2.89 -44.58 8.31 -90.58    |
| 13                 | 18158        | 3342.3      | 119.17     | 0.81 -0.69 -1.19 -24.52 45.28 -53.00  |
| 14                 | 18106        | 2987        | 457.09     | -0.85 1.11 2.84 28.31 -6.30 -24.38    |
| 15                 | 17954        | 2829.7      | -434.35    | 2.59 -0.53 -0.90 2.18 42.68 -18.59    |
| 16                 | 17952        | 3254.7      | -28.62     | -1.37 -0.47 -2.16 -8.31 -36.40 20.15  |
| 17                 | 17726        | 2769.6      | 402.10     | -1.41 -0.67 0.21 -10.45 -18.79 -72.53 |
| 18                 | 17702        | 2283.6      | 168.14     | -2.40 0.61 -1.82 7.23 20.55 -90.44    |
| 19                 | 17674        | 3475.9      | 494.22     | 0.64 -0.33 3.13 -28.23 17.66 11.30    |
| 20                 | 17422        | 3831        | 233.01     | -0.55 0.73 1.63 -7.23 -2.77 -81.27    |

**Table S4.** Docking score of top 20 complexes of designed vaccine construct to MHC-II complexes generated by patchDock server.

| <b>Solution No</b> | <b>Score</b> | <b>Area</b> | <b>ACE</b> | <b>Transformation</b>                |
|--------------------|--------------|-------------|------------|--------------------------------------|
| 1                  | 20970        | 3793.4      | 98.40      | 0.93 0.46 -1.93 95.14 77.03 -13.40   |
| 2                  | 20746        | 3719.3      | 256.36     | -2.29 0.41 0.22 86.33 114.57 23.55   |
| 3                  | 19600        | 3072.4      | 270.52     | 1.72 -0.29 -1.66 92.32 69.45 23.84   |
| 4                  | 19124        | 3343        | 104.07     | 0.53 0.22 1.40 103.84 64.61 31.53    |
| 5                  | 18786        | 2577.5      | 193.64     | 2.03 -0.63 1.36 131.68 78.92 11.70   |
| 6                  | 18782        | 3442.8      | 234.48     | -2.48 0.20 0.22 90.98 117.33 20.12   |
| 7                  | 18616        | 3057.4      | 68.17      | -1.86 -0.34 -2.27 87.76 84.53 21.70  |
| 8                  | 18452        | 2755.8      | 430.87     | -0.78 1.15 2.74 131.71 76.65 -0.46   |
| 9                  | 18386        | 2278.3      | 286.41     | -1.34 -0.51 -2.71 111.38 44.08 30.60 |
| 10                 | 18348        | 3601.7      | -29.78     | -1.97 0.48 0.48 75.28 117.60 23.83   |
| 11                 | 18276        | 3106.2      | -55.80     | 1.00 0.45 -2.07 96.78 75.65 -15.48   |
| 12                 | 18270        | 2688.6      | 142.73     | 0.58 0.32 -2.05 115.60 89.59 25.26   |
| 13                 | 18066        | 2942.7      | 405.24     | 1.30 0.61 -0.12 97.68 78.64 29.76    |
| 14                 | 18010        | 3149        | 188.61     | 1.81 1.04 3.05 130.21 67.10 26.46    |
| 15                 | 17968        | 3233.4      | 174.35     | -2.02 0.48 0.46 74.95 116.35 25.62   |
| 16                 | 17754        | 2775.6      | 414.06     | 0.60 1.29 1.38 114.19 95.78 6.40     |
| 17                 | 17752        | 2846.7      | 80.15      | 1.25 0.47 1.64 129.86 69.18 -28.27   |
| 18                 | 17588        | 2256.1      | 309.52     | 2.10 -0.79 1.36 134.76 79.22 8.07    |
| 19                 | 17588        | 2520.1      | 81.22      | 1.09 0.21 -0.11 126.86 88.54 -20.92  |
| 20                 | 17348        | 2441.7      | 3.36       | 0.70 1.05 1.27 114.47 97.53 3.17     |

**Table S5.** Docking score of top 20 complexes of designed vaccine construct to TLR4 complexes generated by patchDock server

| <b>Solution No</b> | <b>Score</b> | <b>Area</b> | <b>ACE</b> | <b>Transformation</b>                 |
|--------------------|--------------|-------------|------------|---------------------------------------|
| 1                  | 22972        | 4577.9      | 385.16     | -1.38 0.44 1.65 17.60 20.70 -25.44    |
| 2                  | 21532        | 3064.3      | 215.95     | -0.73 -0.32 -0.33 -38.41 -14.52 40.15 |
| 3                  | 21376        | 4205.6      | -26.00     | 2.44 1.15 -2.23 -26.96 -28.12 19.72   |
| 4                  | 21348        | 4023.7      | -183.75    | 2.71 1.24 -2.66 -29.08 -26.38 24.55   |
| 5                  | 21084        | 3362.3      | 356.74     | -0.10 -1.09 0.35 -1.56 38.52 -37.94   |
| 6                  | 19992        | 3107.8      | 433.65     | -1.88 0.16 3.06 17.09 -9.48 -1.29     |

|    |       |        |         |                                       |
|----|-------|--------|---------|---------------------------------------|
| 7  | 19166 | 3697.1 | 29.85   | 3.06 -0.75 -1.90 -43.23 22.68 -84.90  |
| 8  | 18956 | 4994.1 | 121.34  | -1.98 -0.73 0.18 -1.03 -3.71 1.30     |
| 9  | 18850 | 2397.2 | 432.49  | -0.71 -0.26 1.53 -58.22 14.00 -64.53  |
| 10 | 18684 | 2465.1 | 83.37   | 0.19 -1.24 2.22 -10.41 -20.61 43.09   |
| 11 | 18326 | 3234.7 | 299.37  | -2.93 -0.72 0.87 -33.55 39.11 -18.27  |
| 12 | 18274 | 2713.2 | 177.82  | 0.56 0.44 -2.89 -44.58 8.31 -90.58    |
| 13 | 18158 | 3342.3 | 119.17  | 0.81 -0.69 -1.19 -24.52 45.28 -53.00  |
| 14 | 18106 | 2987   | 457.09  | -0.85 1.11 2.84 28.31 -6.30 -24.38    |
| 15 | 17954 | 2829.7 | -434.35 | 2.59 -0.53 -0.90 2.18 42.68 -18.59    |
| 16 | 17952 | 3254.7 | -28.62  | -1.37 -0.47 -2.16 -8.31 -36.40 20.15  |
| 17 | 17726 | 2769.6 | 402.10  | -1.41 -0.67 0.21 -10.45 -18.79 -72.53 |
| 18 | 17702 | 2283.6 | 168.14  | -2.40 0.61 -1.82 7.23 20.55 -90.44    |
| 19 | 17674 | 3475.9 | 494.22  | 0.64 -0.33 3.13 -28.23 17.66 11.30    |
| 20 | 17422 | 3831   | 233.01  | -0.55 0.73 1.63 -7.23 -2.77 -81.27    |

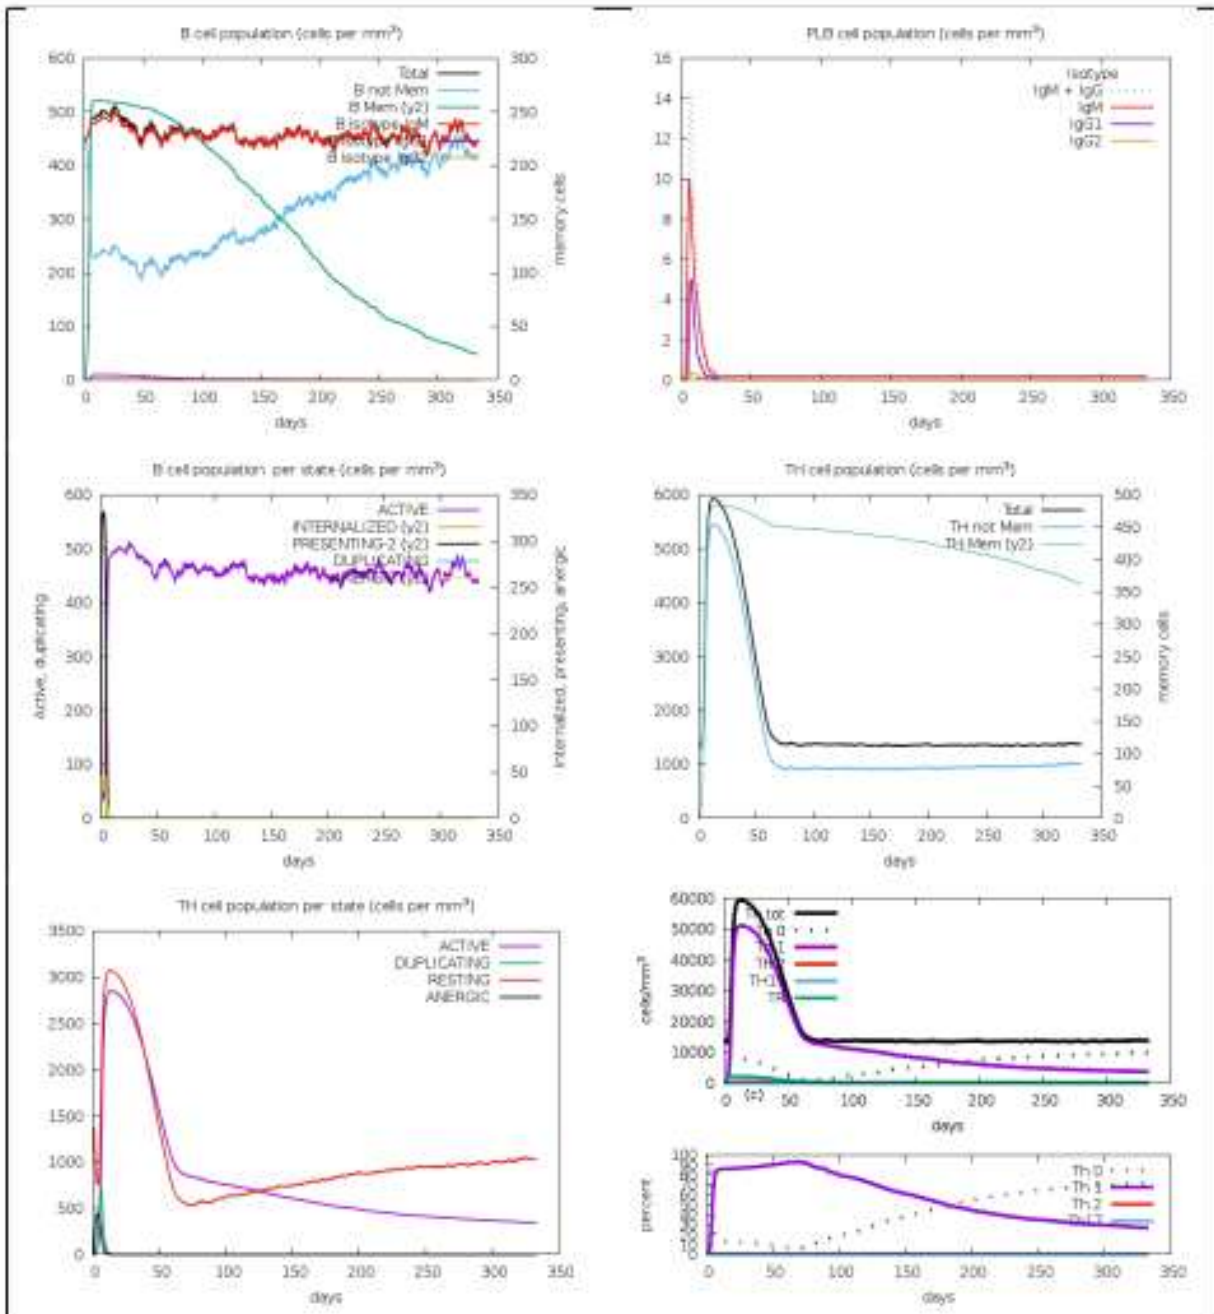

**Figure S1.** B cell and T cell population produced in response to the vaccine antigen.

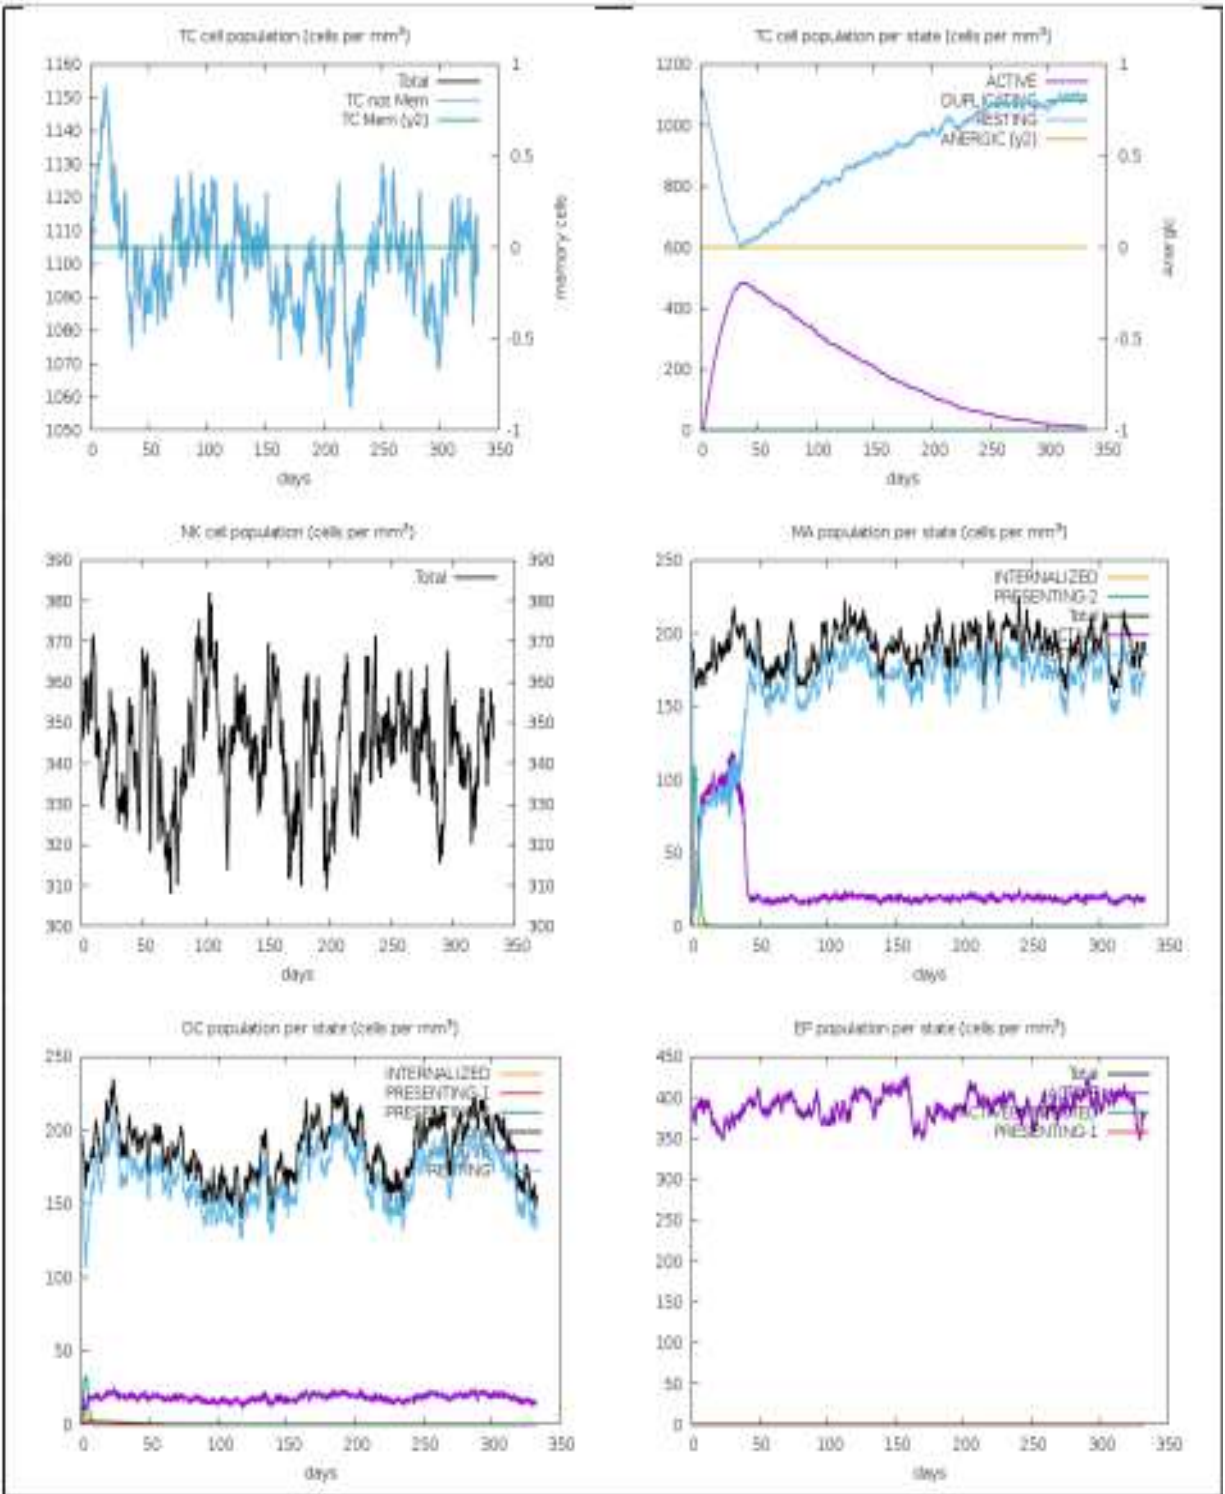

**Figure S2.** Immune cell response generated in response to chimeric vaccine construct. Tc (cytotoxic killer T-cell) Macrophages (Mφ) Nature killer cell, Dendritic and epithelial cell.
